1 **Chromatin accessibility of primary human cancers ties regional mutational**  
2 **processes with tissues of origin**

3

4 Oliver Ocsenas<sup>1,2</sup>, Jüri Reimand<sup>1,2,3,@</sup>

5

6 1. Computational Biology Program, Ontario Institute for Cancer Research, Toronto, ON, Canada

7 2. Department of Medical Biophysics, University of Toronto, Toronto, ON, Canada

8 3. Department of Molecular Genetics, University of Toronto, Toronto, ON, Canada

9 @ correspondence: [Juri.Reimand@utoronto.ca](mailto:Juri.Reimand@utoronto.ca)

## 10 ABSTRACT

11 **Background.** Regional distribution of somatic mutations in cancer genomes associates with  
12 DNA replication timing (RT) and chromatin accessibility (CA), however normal tissues and cell  
13 lines have contributed these insights while associations with the epigenomes of primary cancers  
14 remain uncharacterized.

15 **Results.** Here we model megabase-scale mutation burden in whole cancer genomes using ~900  
16 CA and RT profiles of primary cancers, normal tissues, and cell lines. CA profiles of primary  
17 cancers, rather than normal tissues, predict regional mutagenesis in most cancer types. Regional  
18 mutation burden associates with the CA profiles of matching cancer types, indicating tissue-  
19 specific determinants of mutagenesis. However, mutagenesis in squamous cell and lymphoid  
20 cancers instead associates with RT profiles. Mutational signatures also show tissue-specific  
21 associations with cancer epigenomes, especially for carcinogen-induced and unannotated  
22 signatures. Lastly, while each cancer type includes certain frequently-mutated genomic regions  
23 exceeding epigenome-informed predictions of mutation burden, these regions show a pan-cancer  
24 convergence to biological processes involved in development and cancer. Thus, modelling  
25 excess mutations using epigenomes highlights known cancer driver genes as well as frequently  
26 mutated non-coding regions.

27 **Conclusions.** The dominant association of regional mutation burden with cancer epigenomes  
28 suggests that many passenger mutations are determined by the epigenetic landscapes of  
29 transformed cells and may occur later in tumor evolution. CA-informed models help find cancer  
30 genes and pathways with positive selection and highlight regions where additional mutation  
31 burden is contributed by local mutational processes. This study underlines the complex interplay  
32 of mutational processes, genome function and evolution in cancer and tissues of origin.

33

## 34 INTRODUCTION

35 The cancer genome is a footprint of its evolution and molecular environment that is shaped by  
36 somatic mutations such as single nucleotide variants (SNVs) and structural alterations<sup>1,2</sup>. Cancer  
37 initiation and progression is caused by a small number of driver mutations that provide cells with  
38 selective advantages<sup>3-5</sup>, however most mutations are functionally neutral passengers that are  
39 caused by various mutational processes<sup>6-8</sup>. Somatic mutations also occur in normal tissues and  
40 are frequently observed in known cancer genes<sup>9,10</sup>. Thus, we need to understand mutational  
41 processes to decipher tumor etiology and evolution and better characterize driver mutations.

42 Mutational processes act at different scales of the cancer genome<sup>11,12</sup>. Single base substitution  
43 (SBS) signatures affect certain trinucleotide context of DNA and are associated with aging,  
44 carcinogen exposures, defects in DNA repair pathways, and cancer therapies<sup>6,13</sup>. At a 100-  
45 nucleotide resolution, local mutational processes disproportionately affect certain non-coding  
46 genomic elements such as transcription start sites and binding sites of gene-regulatory proteins  
47 such as CTCF<sup>14-16</sup>. At the regional, megabase-scale resolution of the genome, mutation burden  
48 correlates with DNA replication timing (RT), chromatin accessibility (CA) and transcriptional  
49 activity<sup>17-19</sup>. Early-replicating, transcriptionally active regions of open chromatin have fewer  
50 mutations than late-replicating, passive regions of heterochromatin, potentially due to increased  
51 error rates and decreased mismatch repair later in DNA replication<sup>20-23</sup>. SBS signatures are also  
52 distributed asymmetrically with respect to DNA replication origins and timing<sup>24</sup>. Regional  
53 mutation burden is associated with epigenetic information of related normal cells, providing  
54 evidence of cells of cancer origin contributing to somatic variation<sup>25</sup> and allowing classification  
55 of cancers of unknown origin<sup>26</sup>. However, the precise molecular mechanisms driving these  
56 mutational processes remain incompletely understood. In particular, cell lines and normal tissues  
57 have been used to associate chromatin accessibility and mutation burden in cancer, while the  
58 epigenetic landscapes of primary human cancers remain unexplored.

59 Here we studied cancer epigenomes as determinants of regional mutagenesis in thousands of  
60 whole cancer genomes through a diverse collection of CA and RT profiles of cancers, normal  
61 tissues, and cell lines. CA profiles of matching cancer types, rather than normal tissues, are  
62 the major determinants of regional mutagenesis and mutational signatures in most cancer types.

63 We found tissue-of-origin effects of CA and RT in most predictions, bespoke deviations in  
64 specific cancer types and mutational signatures, and a pan-cancer convergence of excess  
65 mutations to cancer driver genes and developmental pathways. Together, these results underline  
66 the spatial complexity of regional mutagenesis in cancer genomes and highlight epigenome-  
67 informed avenues to discover driver mutations.

68

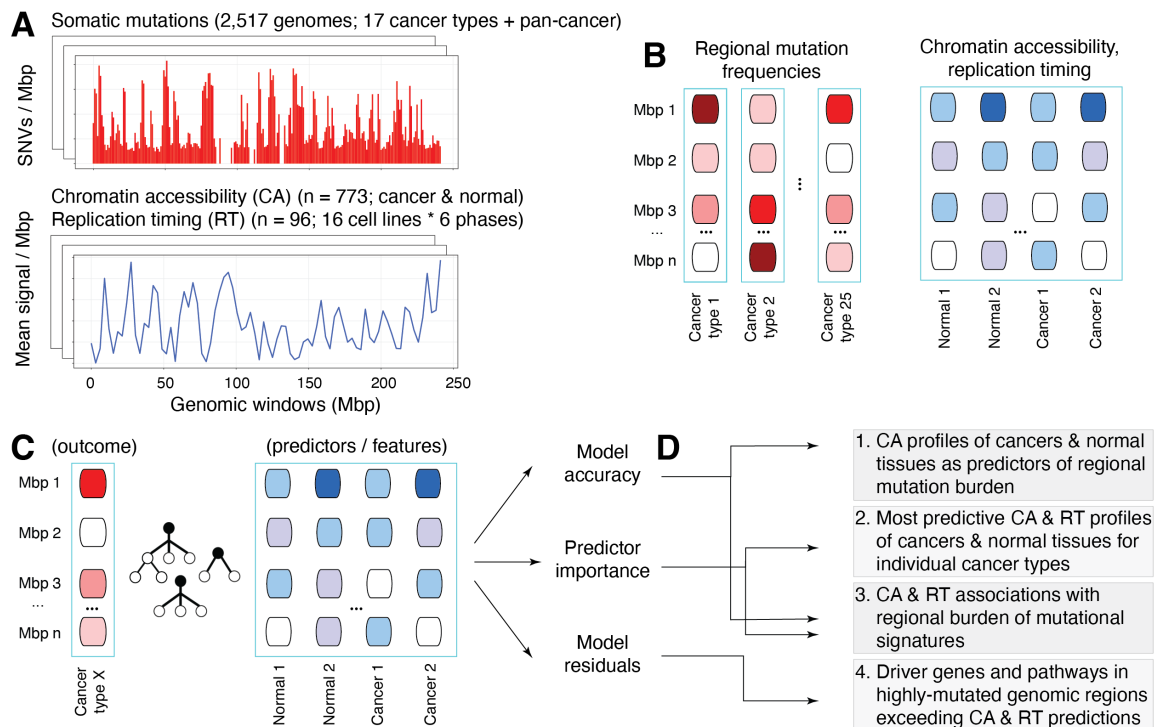

**Figure 1. Characterizing chromatin accessibility (CA) and replication timing (RT) as determinants of regional mutagenesis in cancer genomes.** **A.** Somatic mutations in cancer genomes (top) and CA and RT datasets of normal tissues and cancers (bottom) were integrated to study regional mutational processes. Somatic single nucleotide variants (SNVs) of 2,517 whole cancer genomes were analyzed with 869 genome-wide profiles, including 773 CA profiles of primary human cancers, normal tissues, and cell lines from ATAC-seq experiments, and 96 RT profiles of and six cell cycle phases in 16 cell lines from RepliSeq experiments. **B.** Genomic regions of one megabase (Mbp) were analyzed. Regional mutation burden was estimated as the number of SNVs per megabase region. The mean values scores per region were derived for CA and RT profiles. **C.** Random forest models were trained using regional mutation burden profiles as the outcome and CA and RT profiles as the predictors. We analyzed the pan-cancer dataset and 17 datasets of specific cancer types with relevant CA and RT profiles available. **D.** To associate regional mutation burden with CA and RT, mutational signatures, and cancer driver genes, the random forest models were evaluated in terms of accuracy, predictor importance, and model residuals.

69

## 70 RESULTS

### 71 Chromatin accessibility of primary cancers is a major determinant of regional mutagenesis

72 To study cancer epigenetic profiles as determinants of regional mutagenesis in cancer genomes,  
73 we collected 773 ATAC-seq profiles of genome-wide CA measurements in primary human  
74 cancers, normal tissues and cell lines from ENCODE3, TCGA, and additional studies<sup>27-34</sup>, as  
75 well as 96 RepliSeq profiles of DNA replication timing measurements in 16 cell lines and six  
76 cell cycle phases<sup>35</sup> (**Figure 1A; Supplementary Figure 1, Supplementary Table 1**). As  
77 regional mutation burden, we studied 23 million SNVs in 2,465 highly-mappable genomic  
78 regions of one megabase mapped across 2517 whole cancer genomes of 37 cancer types of the  
79 ICGC/TCGA PCAWG project<sup>1</sup> (**Figure 1B**). The 869 CA and RT profiles were derived as mean  
80 signal intensity values per megabase.

81 To map the complex non-linear associations of CA and RT profiles with regional mutagenesis,  
82 random forest regression models were trained with mutation burden profiles as outcomes and CA  
83 and RT profiles as predictors (*i.e.*, features) for the 17 cancer types for which both genomic and  
84 relevant epigenomic profiles were available (**Figure 1C**). The most informative predictors were  
85 quantified using statistical analysis and local feature prioritization of random forest models<sup>36</sup>  
86 (**Figure 1D**). As expected, genome-wide profiles of regional mutation burden clustered  
87 according to cancer types (**Supplementary Figure 2**).

88 We asked whether the CA profiles of cancers or those of normal cells and tissues showed  
89 stronger associations with regional mutational processes in cancer genomes. We predicted  
90 regional mutation burden in pairs of random forest models with matched data splits where the  
91 predictors included either CA profiles of primary cancers or CA profiles of normal cells and  
92 tissues, respectively. RT profiles were also included as predictors in both models to estimate the  
93 relative contributions of CA.

94 In most cancer types, CA profiles of primary cancers showed stronger associations with regional  
95 mutagenesis than CA profiles of normal cells and tissues (13 of 17,  $P < 0.05$ ) (**Figure 2A**). The  
96 most pronounced signal was observed in breast cancer where the regional mutagenesis  
97 predictions informed by cancer CA profiles were nearly twice as accurate as those informed by

98 CA profiles of normal tissues (median adj.R<sup>2</sup> 0.70 vs. 0.38;  $P < 0.001$ ) (**Figure 2B**). Stronger  
99 associations of cancer CA profiles and regional mutagenesis were also found in cancers of the  
100 prostate, uterus, and kidney, and melanoma: the improvement in prediction accuracy was above  
101 10% in those cancer types ( $P < 0.001$ ). Stronger associations with cancer epigenomes were also  
102 confirmed in the pan-cancer analysis across 37 cancer types, with a small but statistically  
103 significant improvement in model accuracy (adj.R<sup>2</sup> 0.90 vs. 0.88;  $P < 0.001$ ). As the only  
104 exception, regional mutation burden in liver cancer better associated with CA profiles of normal  
105 tissues (adj.R<sup>2</sup> 0.85 vs. 0.83;  $P = 0.044$ ). The analysis provided inconclusive evidence for four  
106 cancer types including lymphoid cancers (BNHL, CLL) and lung and thyroid adenocarcinomas.  
107 We confirmed that the accuracy of regional mutation burden predictions in individual cancer  
108 types was not significantly correlated with the overall mutation burden or the number of  
109 sequenced genomes per cancer cohort (**Supplementary Figure 3**).

110 In summary, this analysis shows that in most cancer types, regional mutagenesis is more strongly  
111 associated with chromatin accessibility of primary human cancers rather than normal tissues and  
112 cell lines, even when accounting for DNA replication timing in the comparison. The diverse  
113 collection of epigenomes included as predictors suggests that tissue-specific chromatin features  
114 of individual cancer types, as well as pan-cancer chromatin features of proliferative cells may  
115 contribute to regional mutagenesis.

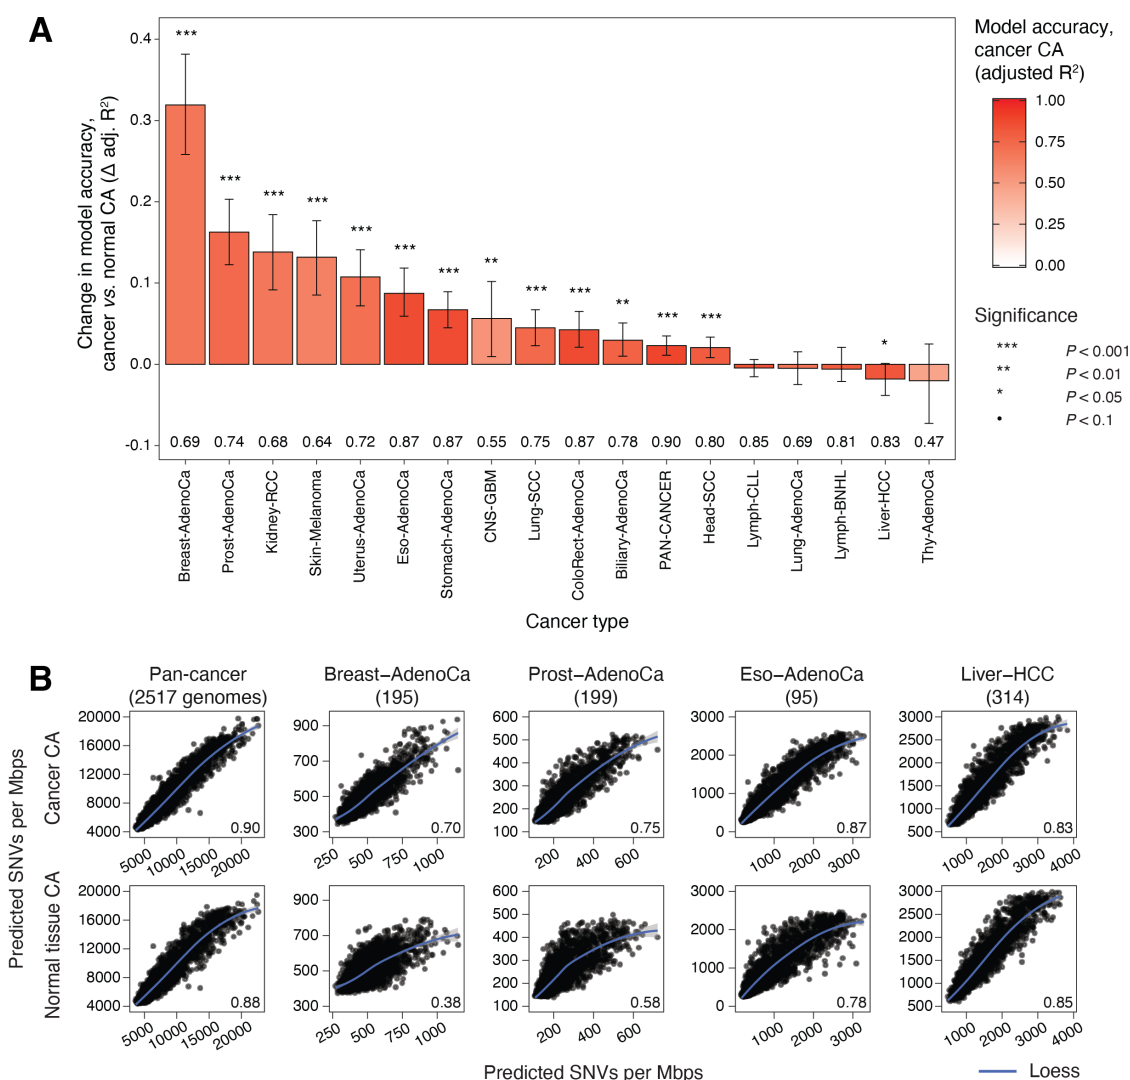

**Figure 2. Chromatin accessibility of primary cancers is a major determinant of regional mutagenesis in cancer genomes. A.** Random forest models informed by CA profiles of primary cancers are more accurate predictors of regional mutation burden, compared to models informed by CA of normal tissues. Bar plot shows relative change in prediction accuracy ( $\Delta$  adjusted  $R^2$ ) of random model regression models informed by CA profiles of primary cancers, compared to matching models informed by CA of normal tissues. Replication timing (RT) profiles are included in all models as reference. Empirical P-values and 95% confidence intervals from bootstrap analysis are shown. Accuracy values of models informed by cancer CA profiles are listed below the bars (adjusted  $R^2$ ). **B.** Examples of regional mutation burden predicted using models informed by CA profiles of cancer (top) vs. CA profiles of normal tissues (bottom). Scatterplots show model-predicted and observed mutation burden (X vs. Y-axis) in one-megabase regions. Prediction accuracy values are shown (bottom right).



117

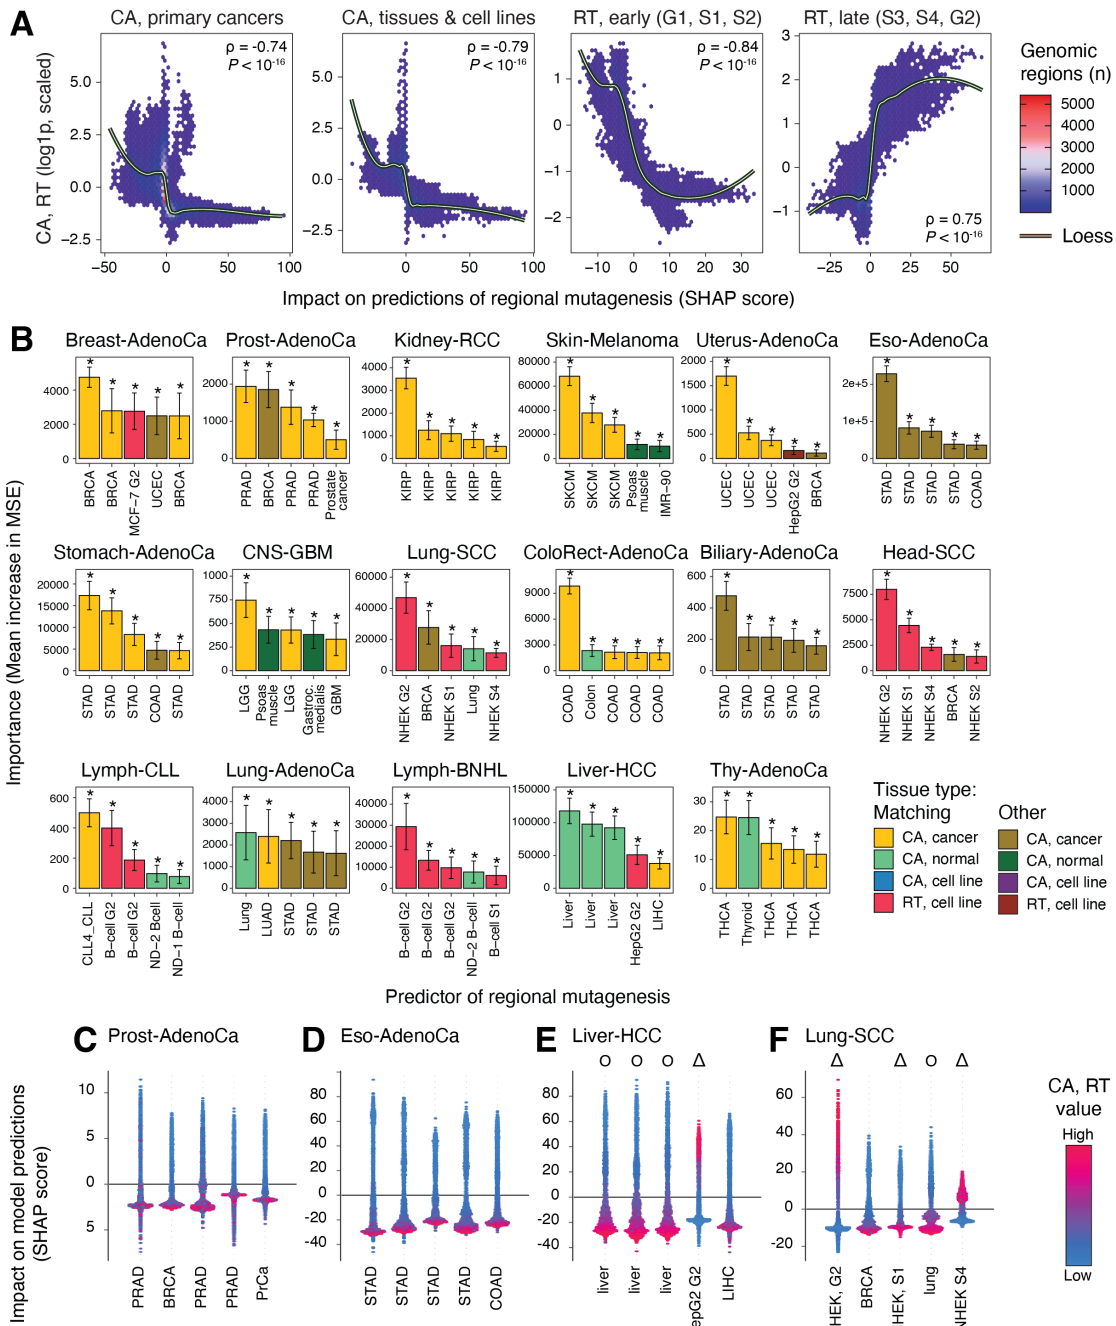

**Figure 3. Top predictors of regional mutagenesis tie cancer types and sites of origin. A.** Quantitative genome-wide associations of regional mutation burden with the most informative CA and RT profiles in random forest models. 2D-density plots show the association CA and RT scores (Y-axis) and Shapley feature importance (SHAP) scores in each genomic window (X-axis) across all cancer types. CA profiles for cancer and normal samples, early RT profiles, and late RT profiles are plotted separately. CA and early RT profiles negatively

correlate with regional mutation burden while late RT profiles correlate positively. Spearman correlation values are shown (top right). **B.** CA profiles of primary cancers are the top predictors of regional mutagenesis in most cancer types. Bar plot shows the importance scores of the five most important predictors of random forest models for 17 cancer types (permutation  $P < 0.001$ ). Error bars show  $\pm 1$  standard deviation from bootstrap analysis. Brighter colors indicate the predictors where the epigenomic profile (CA or RT) matches the mutation profile of the related cancer type. **C-F.** Top predictors of regional mutation burden in individual cancer types. Shapley additive explanation (SHAP) scores show the impact of a given predictor on the predictions of regional mutation burden (Y-axis) relative to the values of the predictor (CA or RT; color gradient). In CA profiles, higher values (red) primarily associate with lower SHAP scores corresponding to increased mutation rates, while in contrast, higher values in late RT profiles associate with higher SHAP scores. Symbols indicate RT profiles (triangles) and CA profiles of normal tissues (circles).

118

### 119 **Top predictors of regional mutagenesis match cancer types and sites of origin**

120 To interpret the determinants of regional mutagenesis, we asked which specific CA and RT  
121 profiles contributed the most to the predictive models when using all 869 cancer and normal  
122 epigenomes as predictors. We selected the five most significant predictors for each cancer type  
123 (permutation  $P < 0.001$ ). These 85 CA and RT profiles were quantified using Shapley additive  
124 explanation (SHAP) scores<sup>36</sup> that measured the directional associations of individual profiles  
125 with the regional mutation burden in all genomic regions. As expected, regional mutation burden  
126 negatively correlated with CA profiles of primary cancers and normal tissues ( $\rho_{\text{cancer}} = -0.74$  vs  
127  $\rho_{\text{normal}} = -0.79$ ;  $P < 10^{-16}$ ) (**Figure 3A**). A dual relationship was apparent in RT profiles: RT  
128 profiles of late cell cycle phases positively correlated with regional mutation burden while RT  
129 profiles of early cell cycle phases correlated negatively ( $\rho_{\text{late}} = 0.75$  vs.  $\rho_{\text{early}} = -0.84$ ,  $P < 10^{-16}$ ).  
130 The inverse relationships of CA and RT with respect to regional mutation burden are consistent  
131 with previous studies<sup>17-23</sup> and extend here to a diverse collection of epigenomes from primary  
132 cancers and normal tissues.

133 We examined the most significant predictors of regional mutation burden for each cancer type  
134 (**Figure 3B**). CA profiles of primary cancers dominated among the strongest predictors of  
135 regional mutation burden in 12 of 17 cancer types. Most CA profiles represented the same or  
136 related cancer type where the regional mutation burden was predicted, underlying tissue-specific

137 interactions of chromatin state and somatic mutagenesis Overall, CA profiles of primary cancers  
138 were enriched among the top predictors (55 of 85 profiles observed vs. 41 expected, Fisher's  
139 exact  $P = 0.011$ ), confirming the stronger association with primary cancer epigenomes and  
140 regional mutagenesis. Regional mutation burden measured in the breast, prostate, kidney,  
141 stomach, and thyroid cancer cohorts of the PCAWG WGS dataset associated with the CA  
142 profiles of the matching cancer samples in TCGA (BRCA, PRAD, KIRP, STAD, and THCA,  
143 respectively). For example, in prostate cancer, four CA profiles of primary prostate cancers and  
144 one breast cancer profile associated negatively with regional mutation burden (**Figure 3C**).  
145 Additional associations were apparent at the level of organ systems. CA profiles of stomach and  
146 colorectal cancers were the top predictors of regional mutation burden in biliary and esophageal  
147 cancers (**Figure 3D**), suggesting epigenetic and mutational similarities of cancers of the  
148 gastrointestinal tract. As another example, regional mutagenesis in breast cancer genomes was  
149 significantly associated with one CA profile of uterine cancer, and a similar association with  
150 breast cancer CA was apparent in uterine cancer genomes, perhaps explained by common  
151 mutational processes in cancers of the female reproductive system. Therefore, regional  
152 mutational processes in individual cancer types have strong tissue-specific interactions with the  
153 epigenomes of these cancer types.

154 Fewer CA profiles of normal tissues were found among top predictors of regional mutation  
155 burden. The strongest association with normal tissue epigenomes was apparent in liver cancer, as  
156 three CA profiles of normal liver were detected as the highest-ranking predictors of regional  
157 mutation burden (**Figure 3E**). CA profiles of normal tissues were identified as predictors in  
158 seven other cancer types, however their feature importance scores were lower compared to CA  
159 profiles of related primary cancers. As expected, these CA profiles of normal tissues also  
160 matched the cancer types where regional mutagenesis was measured. For example, in thyroid  
161 cancer, one normal thyroid CA profile and four primary cancer CA profiles of the matching  
162 cancer type (THCA) were the top predictors of regional mutation burden.

163 Replication timing showed the strongest associations in squamous cell cancers (SCC) and  
164 lymphoid cancers, reflecting tissue-specific effects. Mutations in Lung-SCC and Head-SCC  
165 cohorts of PCAWG associated with RT profiles of NHEK cells, a squamous cell line of human  
166 epidermal keratinocytes (**Figure 3F**). Similarly, regional mutation burden in lymphoid cancers

167 (Lymph-BNHL, Lymph-CLL) strongly associated with RT profiles of B-cells. One potential  
168 explanation of these normal cell lines associating with regional mutagenesis in those cancer  
169 types, rather than CA profiles of primary cancers, is an earlier occurrence of mutagenesis in the  
170 evolution of these cancer types. In the genomes of Lung-SCC and Head-SCC cohorts of  
171 PCAWG, many mutations are associated with signatures of tobacco exposure, while somatic  
172 hypermutation contributes to genome variation in normal B-cells and lymphomas <sup>37</sup>.

173 Most RT predictors of regional mutagenesis we found in the analysis (12/15) represented late-  
174 replicating cell cycle phases G2 and S4. Individual RT profiles positively associated with  
175 regional mutation burden in late-replicating regions (*e.g.*, phase G2 of MCF-7 in breast cancer)  
176 and negatively in early-replicating regions (*e.g.*, phase S1 of HNEK in Head-SCC), consistent  
177 our analysis above (**Figure 3A**) and with earlier observations that elevated regional mutagenesis  
178 is caused by increased DNA damage and decreased repair in late-replicating regions <sup>20</sup>.

179 Fewer RT profiles occurred among top predictors compared to CA profiles in other cancer types.  
180 RT profiles of matching cell lines (MCF-7, HepG2) were found among predictors of regional  
181 mutation burden in breast and liver cancer, respectively, and the latter RT profile was also a  
182 minor but significant predictor in uterine cancer. In general, fewer and less-diverse RT profiles  
183 of cell lines were available for this analysis, and these offer only a limited representation of  
184 mutational processes in different cancer types. In contrast, the larger set of CA profiles  
185 represents more cancer types and provides complementary information to RT. This analysis  
186 extends our findings of tissue-specific CA and RT profiles as the principal predictors of regional  
187 mutagenesis and underlines the effects of cell-of-origin and tumor heterogeneity. Dominance of  
188 cancer CA profiles among top predictors in most cancer types is consistent with our first  
189 observations that CA profiles of primary cancers provide accurate predictions of regional  
190 mutagenesis.

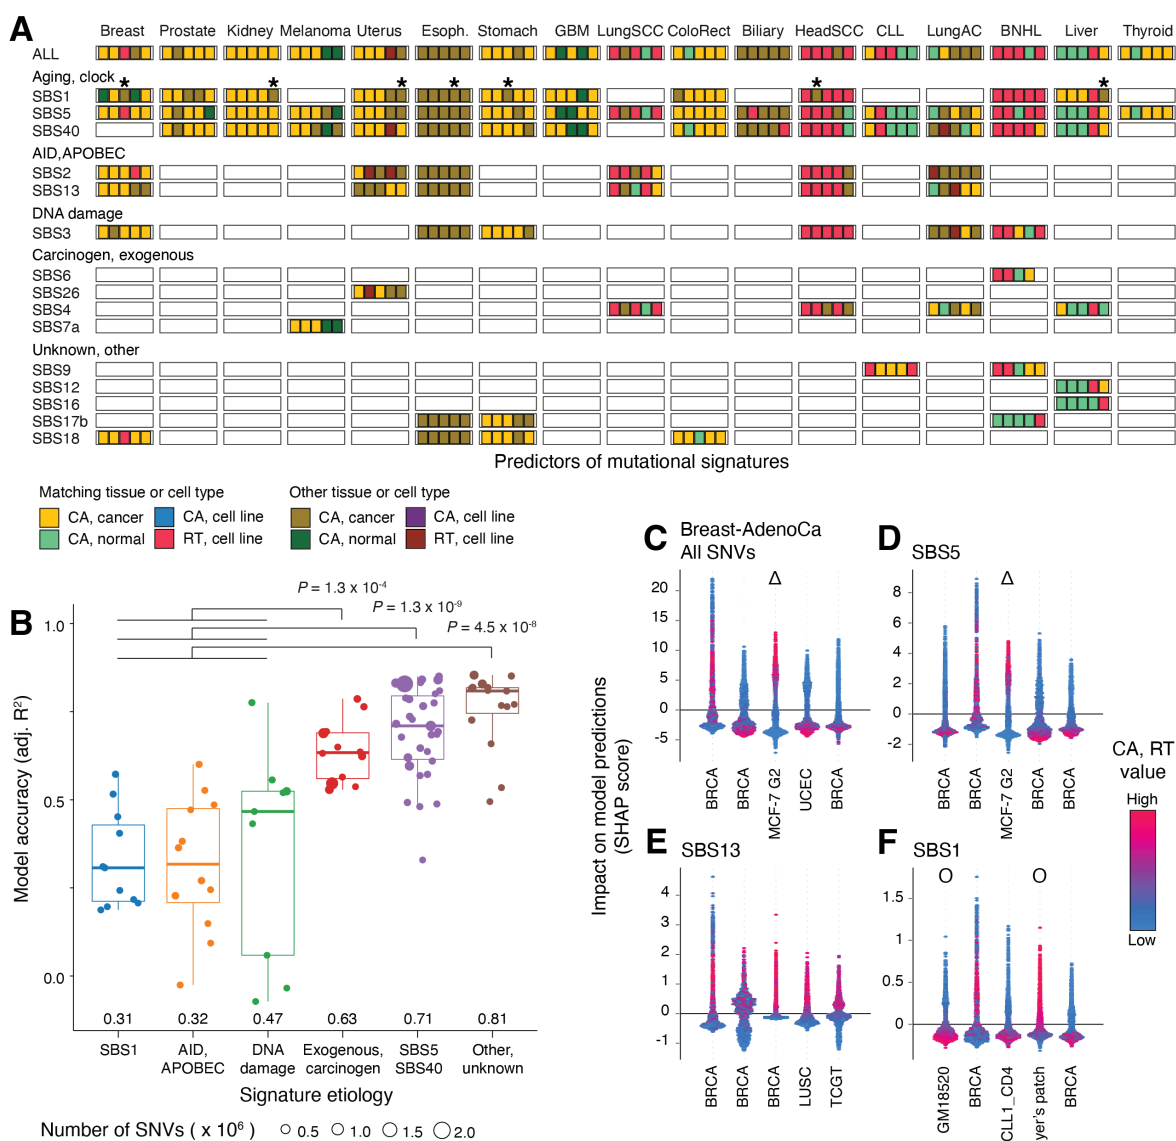

**Figure 4. Associations of mutational signatures with chromatin accessibility and replication timing.** **A.** Top predictors of megabase-scale mutation burden of single base substitution (SBS) signatures (top five predictors;  $P < 0.001$ , permutation test). Colors indicate the predictor type (CA, RT) and its relationship to the cancer type where mutagenesis is predicted (matching site/tissue or other). Brighter colors indicate the predictors where the epigenomic profile (CA or RT) matches the cancer type of the mutation profile. Asterisks indicate CA profiles of CD4-positive T-cells as predictors of SBS1 mutations. **B.** Prediction accuracy of megabase-scale burden of SBS signatures using CA and RT profiles. Signatures of carcinogens, unknown origin, and aging are more accurately predicted by CA and RT profiles than endogenous signatures.  $P$ -values are computed using F-tests with adjustment for genome-wide signature burden. Median accuracy values are printed. **C-F.** Top predictors of megabase-scale mutation burden in breast cancer quantified using SHAP scores. SHAP scores show the impact of a predictor (*i.e.*, CA or RT profile) on the predictions (Y-axis) and corresponding predictor values (color

gradient). **C.** Regional mutation burden in breast cancer genomes is predicted by CA profiles of primary breast cancers (BRCA) and uterine cancer (UCEC) as well as later replication timing (G2 phase) in a breast cancer cell line (MCF-7). CA profiles mostly negatively associate with mutagenesis while late RT profiles associate positively. **D.** Age-related mutations of SBS5 are predicted by BRCA CA profiles as well as RT profile of MCF-7, similarly to overall SNV burden. **E.** APOBEC-related mutations of SBS13 are also predicted by CA profiles (BRCA, as well as LUSC, TCGT); however, SHAP scores show that SBS13 mutations are positively correlated with CA. **F.** SBS1 mutations related to molecular clock activity are predicted by diverse CA profiles: two breast cancers as well as blood and immune cells (GM18520, CLL1\_CD4, Peyer's patch). Symbols indicate RT profiles (triangles) and CA profiles of normal tissues (circles).

191

## 192 **Associations of mutational signatures with chromatin accessibility and replication timing**

193 We asked whether the associations of regional mutagenesis with CA and RT are further  
194 explained by mutational signatures. We quantified the megabase-scale mutation burden  
195 separately for the major single base substitution (SBS) signatures based on PCAWG datasets <sup>6</sup>  
196 and predicted their regional distributions using random forest regression. We then selected the  
197 top five CA and RT profiles that most significantly associated with the burden of each  
198 mutational signature and cancer type ( $P < 0.001$ ).

199 We compared the top CA and RT profiles that associated with total regional mutation burden and  
200 the burden of individual mutational signatures (**Figure 4A**). Top predictors of individual  
201 signatures were often consistent with predictors of bulk regional mutation burden and showed  
202 tissue-specific associations of mutagenesis and chromatin accessibility. Matching CA profiles of  
203 cancers were the top predictors of mutational signatures in breast, kidney, colorectal and stomach  
204 cancers, while RT profiles of matching cell lines associated with mutations in SCCs and  
205 lymphoid cancers. Top predictors of endogenous and exogenous signatures were also mostly  
206 consistent, indicating that various mutational processes are affected by the epigenetic landscapes  
207 of cancers or their normal cells of origin.

208 SBS1 mutations showed the most variation in terms of CA profiles, compared to the profiles  
209 predictive of bulk mutations and other SBS signatures. Interestingly, the CA profile of CD4-  
210 positive T-cells from the peripheral blood of a CLL patient (CLL1\_CD4) was consistently

211 detected as a predictor of SBS1 mutation burden in six solid cancer types (liver, kidney, uterus,  
212 esophagus, stomach, head). This CA profile was only specific to SBS1 mutations and was not  
213 associated with bulk mutation burden or any other SBS signatures in the cancer types we studied.  
214 This T-cell CA profile may represent somatic mutations in non-cancerous cells of the immune  
215 system or the tumor microenvironment. As another example, SBS1 mutations in liver cancer  
216 associated with CA profiles of liver cancers, while overall regional mutation burden was  
217 predominantly associated with CA profiles of normal liver tissues. The clock-like SBS1  
218 signature of 5-methylcytosine deamination is associated with cancer patient age and stem cell  
219 division rate, and this signature has been found in the somatic genomes of normal tissues and  
220 adult stem cells<sup>10,38,39</sup>. Thus, SBS1 mutations may represent an earlier timepoint in tumor  
221 evolution or contribution from normal cells that remain convoluted in bulk tissue sequencing.

222 We asked if our random forest models were equally informative of various mutational signatures.  
223 Six classes of SBS signatures were compared in terms of prediction accuracy: APOBEC/AID,  
224 DNA-repair, carcinogens, two age-related classes (SBS1 and SBS5/40), and signatures of  
225 unknown cause, as predicted via all 869 CA and RT profiles in 17 cancer types. Three classes of  
226 signatures showed stronger associations with CA and RT profiles (**Figure 4B**): random forest  
227 predictions of carcinogenic signatures, signatures of unknown cause, and aging-associated  
228 signatures SBS5 and SBS40 were significantly more accurate than the DNA repair,  
229 APOBEC/AID, and SBS1 signatures combined, when accounting for number of mutations per  
230 signature as covariate of prediction accuracy ( $P \leq 10^{-4}$ ; F-test) (**Supplementary Figure 4**). Thus,  
231 the mutational processes of carcinogen exposures, SBS5/40, and unknown signatures show  
232 stronger interactions with CA and RT in cancer genomes.

233 We studied the interactions of SBS signatures with CA and RT profiles in breast cancer (**Figure**  
234 **4C-F**). SBS5 mutations, representing most mutations in the cohort, associated with four CA  
235 profiles of primary breast cancers (BRCA) and one late DNA-replicating profile of the breast  
236 cancer cell line MCF-7, reflecting tissue-specific associations of mutations and chromatin  
237 (**Figure 4D**). Regional mutation burden of all mutations was consistent with SBS5, and similarly  
238 associated with CA and RT profiles of breast cancer (**Figure 4C**). However, an additional  
239 predictive CA profile of uterine cancer was identified, perhaps due to common epigenetic  
240 features of female hormone-driven cancers. Megabase-scale burden of all mutations and the

241 regional burden individual signatures negatively correlated with CA profiles in most cases, as  
242 expected. In contrast, SBS2 and SBS13 signatures of AID/APOBEC mutagenesis correlated  
243 positively with CA, such that higher SHAP values corresponded to increased chromatin  
244 accessibility (**Figure 4E**). This agrees with prior observations that AID targets epigenetically  
245 active elements and results in kataegis and clustered mutational signatures<sup>6,40,41</sup>. Lastly, SBS1  
246 mutations associated with three CA profiles representing peripheral blood, lymphoid follicles,  
247 and immune cells (**Figure 4F**), perhaps reflecting somatic mutagenesis in tumor-infiltrated  
248 immune cells and other cells in the tumor microenvironment. In summary, individual mutational  
249 signatures also predominantly associate with CA of primary cancers rather than normal tissues.  
250 The complex interactions of CA and RT with regional mutagenesis in certain mutational  
251 signatures may reflect inter-and intra-tumoral heterogeneity and help characterize the  
252 mechanisms of mutational processes.



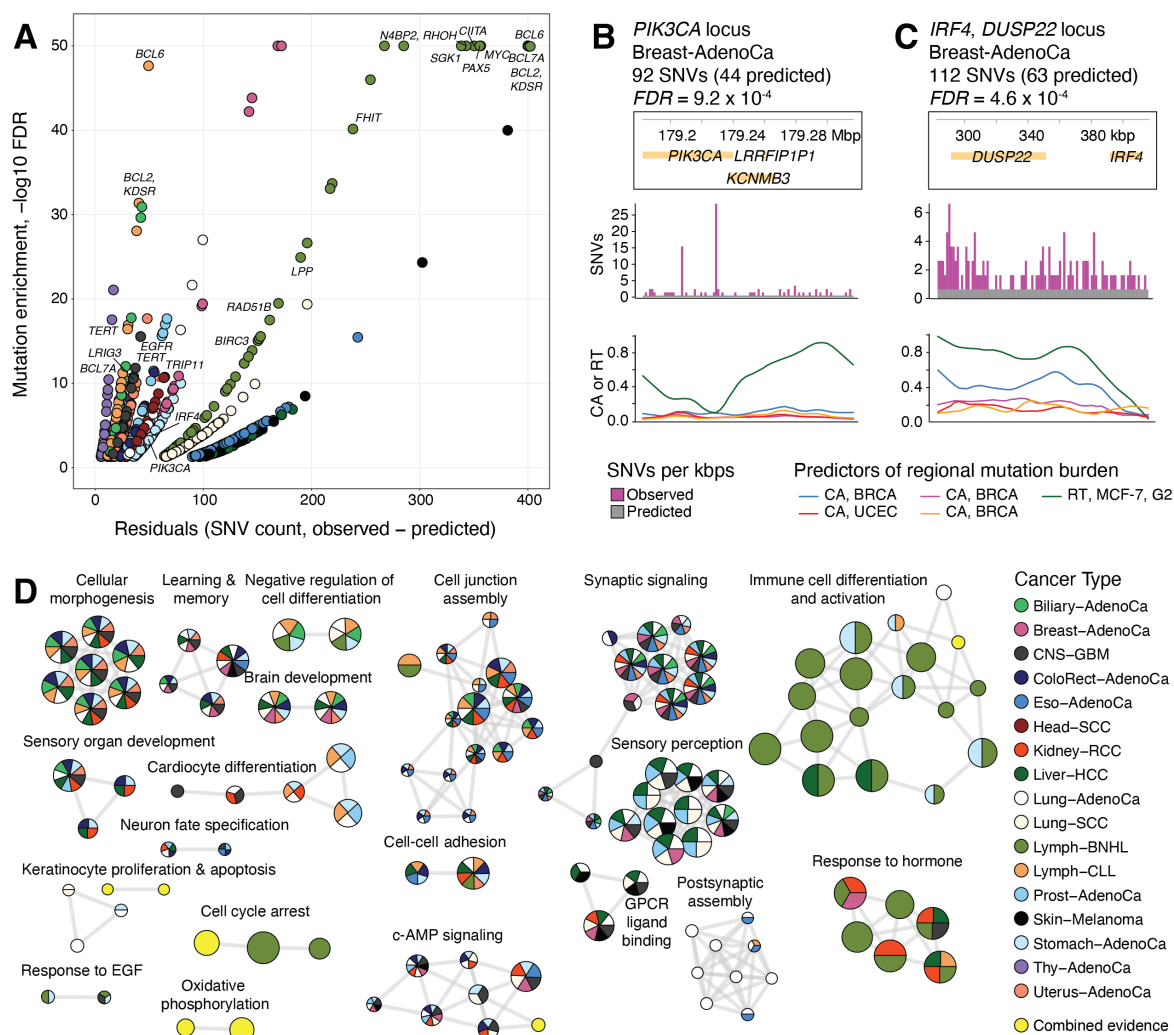

**Figure 5. Excess mutation burden unexplained by CA and RT profiles converges to cancer genes and developmental pathways.** **A.** Additional mutation burden exceeding predictions of CA and RT profiles, quantified via significantly higher model residuals of individual 100-kbps genomic windows. Scatter plot shows the genomic windows with elevated regional mutation burden ( $FDR < 0.05$ ). Regions with known cancer genes are labeled if  $FDR < 10^{-10}$ . Colors indicate cancer types (see panel D). X-axis is capped at  $10^{-50}$  and Y-axis is capped at 400. **B-C.** Examples of genomic regions with excess mutation burden and known or putative cancer driver mutations. The plots show the genes in the region (top), mutation burden (SNVs per kbps; observed and expected) (middle), and the top five most significant predictors (*i.e.*, CA and RT profiles; bottom). **B.** The genomic region encoding the driver gene *PIK3CA* in breast cancer. **C.** Super-enhancer region at the *IRF4-DUSP22* locus with elevated mutation burden in breast cancer. **D.** Pathway enrichment analysis of genomic regions with significantly higher regional mutation burden relative to CA and RT-informed predictions. The enrichment map shows significantly enriched biological processes and pathways ( $FDR < 0.05$ ). The nodes represent enriched pathways and processes, the edges connect nodes sharing many genes, and the manually

annotated subnetworks represent functionally related pathways and processes. Colors show the cancer types where the pathway enrichments were detected. Pathways and processes only detected in the joint analysis of multiple cancer types are shown in yellow.

253

## 254 **Excess mutations unexplained by epigenomes converge to cancer driver genes and** 255 **developmental pathways**

256 To quantify the regional mutagenesis unexplained by CA and RT, we investigated the genomic  
257 regions that were enriched in mutations relative to the mutation burden predicted by random  
258 forest regression. To enable a more detailed, gene-level functional analysis of enriched  
259 mutations, we repeated the predictions of regional mutation burden using a finer 100-kbps  
260 genomic resolution. This revealed 1570 unique genomic regions in 17 cancer types that were  
261 significantly enriched in mutations based on the CA- and RT-informed model residuals ( $FDR <$   
262  $0.05$ ) (**Figure 5A**). The mutation-enriched regions encoded 900 protein-coding genes including  
263 67 known cancer genes<sup>42</sup>, significantly more than expected by chance (33 expected, Fisher's  
264 exact  $P = 3.1 \times 10^{-8}$ ). Most driver genes were only found in single cancer types and represented  
265 key disease-specific drivers such as *EGFR* and *TERT* in glioma, *MYC* in BNHL and *APC* in  
266 colorectal cancer (**Supplementary Figure 5**). For example, in breast cancer, the region encoding  
267 *PIK3CA* was significantly enriched in mutations compared to the expected mutation burden  
268 based on the CA and RT landscape (92 SNVs observed vs. 44 expected;  $FDR = 9.2 \times 10^{-4}$ )  
269 (**Figure 5B**). *PIK3CA* is a major driver gene of breast cancer with hotspot mutations<sup>43</sup>, thus  
270 showing that genome-wide statistical models of CA and RT can capture known driver genes.

271 The models also revealed regions with frequent non-coding mutations. The most prominent  
272 region was found in 12 of 17 cancer types due to unexpectedly frequent mutations, including  
273 breast cancer (112 SNVs observed vs. 63 expected;  $FDR = 4.6 \times 10^{-4}$ ) (**Figure 5C**;  
274 **Supplementary Figure 6**). The region encodes the oncogenic transcriptional regulator *IRF4*  
275 (interferon regulatory factor 4)<sup>44</sup> and *DUSP22* encoding a signaling protein that was recently  
276 described as a network-implicated driver gene due to non-coding mutations<sup>45</sup>. The region also  
277 includes super-enhancers of immune cells<sup>46</sup>. The recurrence of mutations in this region in  
278 multiple cancer types highlights it as a potential pan-cancer region of interest.

279 We then asked whether the frequently-mutated regions were associated with common biological  
280 pathways and processes. An integrative pathway enrichment analysis that prioritized genomic  
281 regions detected in multiple cancer types revealed 177 significantly enriched pathways and  
282 processes ( $FDR < 0.05$ , ActivePathways<sup>47</sup>), of which 142 (80%) were detected in more than one  
283 cancer type (**Figure 5D**). These findings converged into several functional themes of similar  
284 pathways and processes. First, developmental processes related to brain and the central nervous  
285 system, reproductive and sensory organs were associated with elevated mutation burden in  
286 multiple cancer types. Second, a group of processes related to synapse organization, olfactory  
287 and GPCR signaling were also identified in most cancer types. Third, cancer-related processes of  
288 cell cycle, hormone response, and signal transduction were also identified, often through pan-  
289 cancer data integration but not in any specific cancer type specifically. Lastly, a major group of  
290 processes related to immune system activation were predominantly detected in BNHL,  
291 potentially reflecting aberrant somatic hypermutation, as well as fewer associations with liver  
292 and stomach cancers.

293 This analysis shows that although individual frequently-mutated genomic regions are mostly  
294 characteristic of specific cancer types, enriched mutations converge to common pathways and  
295 processes in multiple cancer types. Convergence of these excess mutations to developmental and  
296 cancer-related processes is potentially explained by additional focal mutational processes  
297 targeting epigenetically active regions of the genome that are not captured by our models at the  
298 broader, sub-megabase resolution. Further, the enrichment of known cancer driver genes  
299 suggests that positive selection of functional mutations may also contribute to this additional  
300 mutation burden. This analysis exemplifies the complex interplay of cancer epigenomes, multi-  
301 scale mutational processes and positive selection of cancer genes.

## 302 **DISCUSSION**

303 Our analysis highlights chromatin accessibility of primary human cancers as a major determinant  
304 of regional mutational processes in cancer genomes. Cancer epigenomes are predictive of  
305 regional mutation burden of matching cancer types, indicating tissue of origin associations in  
306 most cancer types we studied. While these associations are apparent for overall regional mutation  
307 burden in cancer genomes, they are also consistent with the regional variations in mutational  
308 signature burden. In contrast, the chromatin states of normal tissues and cell lines show only  
309 limited associations with regional mutagenesis of cancer genomes, extending the earlier studies  
310 that used the epigenetic profiles of cell lines and normal tissues to characterize mutational  
311 processes. The transformation of normal cells to cancer cells involves major changes in their  
312 epigenetic landscapes as gene-regulatory programs of cancer hallmark pathways are activated.  
313 Thus, one potential explanation to this stronger association of cancer epigenomes and regional  
314 mutagenesis is that mutational processes have a longer exposure on the somatic genomes shaped  
315 by the epigenomes of transformed cells, suggesting that many passenger mutations occur later in  
316 cancer evolution after the cells have acquired the epigenetic characteristics of cancer cells.

317 Replication timing information also associated with regional mutagenesis and confirmed strong  
318 effects with cell types related to cancer origin. However, CA profiles of primary human cancers  
319 evidently captured a larger fraction of variation of regional mutagenesis compared to RT  
320 profiles, apart from squamous cell and lymphoid cancers that strongly associated with relevant  
321 cell lines. Fewer RT profiles are used as predictors in our dataset and include mitotic cell lines  
322 that offer only limited representation of the diverse disease types in the pan-cancer cohort. As  
323 our models also include DNA replication timing profiles of several cell lines as reference, the  
324 stronger association with epigenomes of primary cancers shows that cancer epigenomes  
325 complement replication timing information with respect to regional mutagenesis. Interestingly,  
326 DNA replication has been shown to determine chromatin state<sup>48</sup>. Thus, the informative CA  
327 profiles of human cancers may represent a proxy of cancer-specific replication dynamics.

328 Mutational signature analysis revealed interactions of mutational processes with CA and tissues  
329 of origin. Carcinogen signatures, as well as signatures of unknown etiology, were overall better  
330 predicted by CA and RT, in contrast to signatures of aging and DNA damage where the genome-

331 wide predictions were less accurate. The stronger association of carcinogen signatures suggests  
332 that the chromatin environment interacts with DNA damage or repair processes of carcinogen  
333 exposure, for example through elevated mutational processes targeting active genes that are  
334 otherwise protected from mutations through error-free mismatch repair <sup>41</sup>. Early replicating  
335 regions in cells exposed to tobacco mutagens show elevated mutagenesis in transcribed strands  
336 due to differential nucleotide excision repair activity <sup>49</sup>. Based on their stronger interactions with  
337 RT and CA profiles, we speculate that some mutational signatures of currently unknown etiology  
338 may relate to carcinogens. SBS17 mutations show some of the strongest interactions with CA  
339 and RT in stomach and esophageal cancers in our analysis. This signature is currently of  
340 unknown cause, however it has been linked to gastric acid reflux and reactive oxygen species <sup>24</sup>.  
341 Further integrative analysis of clinical and lifestyle information with patterns of regional  
342 mutagenesis may shed light to these mutational processes.

343 We observed a functional convergence to developmental processes and cancer-related pathways  
344 in the genomic regions where mutations were enriched beyond the predictions of our epigenomic  
345 models. On the one hand, these data suggest that additional mutational processes affect distinct  
346 regions with developmental genes and open-chromatin regions in individual cancer types,  
347 however these regions converge to the same molecular pathways across cancer types. Such local  
348 mutational processes are consistent with previous studies. For example, transcription start sites of  
349 highly expressed genes and constitutively-bound binding sites of CTCF are subject to elevated  
350 local mutagenesis in multiple cancer types <sup>16</sup>. Lineage-specific genes are enriched in indel  
351 mutations in solid cancers <sup>50</sup>. Such local mutational processes are complementary to megabase-  
352 scale processes where open chromatin is generally associated with a lower mutation frequency.  
353 On the other hand, the enrichment of cancer genes and pathways in our data suggests that some  
354 mutations unexplained by CA and RT are functional in cancer and their frequent occurrence at  
355 specific genes, non-coding elements and molecular pathways is explained by positive selection <sup>3-</sup>  
356 <sup>5,45</sup>. We can use this computational framework to find genomic regions with known and putative  
357 driver mutations in coding and non-coding sites. Further study of these regions may deepen our  
358 understanding of mutational processes and refine the catalogues of driver mutations.

359 This approach enables future studies to decipher the mechanisms and phenotypic associations of  
360 mutational processes. Clinical, genetic, and epigenetic profiles of cancer patients can be

361 integrated to understand how regional mutational processes and the chromatin landscape are  
362 modulated by clinical variables such as stage, grade or the therapies applied, genetic features  
363 such as somatic driver mutations or inherited cancer risk variants, or lifestyle choices such as  
364 tobacco or alcohol consumption. Complementary insights from sub-clonal reconstruction  
365 analysis of cancer genomes <sup>2,51</sup>, as well as single-cell sequencing of genomes and epigenomes  
366 will allow mapping of regional mutagenesis at the level of distinct cell populations contributing  
367 to temporal and spatial variation in mutational processes. As such multimodal datasets grow, we  
368 can learn about early cancer evolution by comparing regional mutagenesis in the genomes of  
369 cancers and normal cells. Understanding the molecular and genetic determinants of regional  
370 mutagenesis and signatures in cancer genomes may help characterize carcinogen exposures and  
371 genetic predisposition, ultimately enhancing early cancer detection and prevention in the future.

## 372 **Methods**

373 **Somatic mutations in whole cancer genomes.** We analyzed somatic single nucleotide variants  
374 (SNVs;  $n = 43,778,859$ ) derived from whole-genome sequencing (WGS) of 2,583 primary  
375 cancer samples that were uniformly mapped to GRCh37/hg19 as part of the ICGC/TCGA Pan-  
376 cancer Analysis of Whole Genomes (PCAWG) project <sup>1</sup>. Indels and variants in sex chromosomes  
377 were excluded. To integrate mutations with epigenetic information, we mapped the SNVs to the  
378 human genome version GRCh38 using the LiftOver function of the rtracklayer package in R (v  
379 1.48) <sup>52</sup>. We removed 66 hypermutated tumors with more than 90,000 mutations (~30 mutations  
380 / Mbps), resulting in a dataset of 23,215,600 SNVs in 2,517 whole cancer genomes. We analyzed  
381 the genomes of 17 cancer types with at least 25 samples in PCAWG as well as related epigenetic  
382 profiles of normal and cancer tissues, as well as the pan-cancer dataset of all 37 cancer types.

383 **Chromatin accessibility (CA) and replication timing (RT) profiles.** Chromatin accessibility  
384 data was derived from several ATAC-seq datasets, including the ENCODE3 project and six  
385 additional studies to maximize the coverage of cancer types included in the PCAWG dataset, as  
386 described below. CA profiles of 196 human cell and tissue types and 9 cancer cell lines at a  
387 single basepair (bp) resolution in GRCh38 were derived from the ENCODE3 project <sup>27</sup>. CA  
388 profiles of 115 normal human brain samples at a single bp resolution in GRCh37 were retrieved  
389 from the study by Fullard *et al.* <sup>29</sup>. CA profiles of 21 normal immune cell types (B-cells, T-cells)  
390 and 34 primary cancers (CLL) at a single base pair resolution in GRCh37 were retrieved from  
391 the study by Rendeiro *et al.* <sup>30</sup>. Four CA profiles of HEK293 embryonic kidney cells at a 10-bp  
392 resolution in GRCh37 were retrieved from the study by Karabacak Calviello *et al.* <sup>31</sup>. CA profiles  
393 for two lymphoma cell lines at a single-bp resolution in GRCh37 were retrieved from the study  
394 by Scharer *et al.* <sup>32</sup>. One CA profile of the normal human melanocytes (NHM1) cell line at a 10-  
395 bp resolution in GRCh37 were retrieved from the study by Fontanals-Cirera *et al.* <sup>33</sup>. CA profiles  
396 of four normal prostate tissues and six primary prostate cancers at a single-bp resolution in  
397 GRCh37 were retrieved from the study by Pomerantz *et al.* <sup>34</sup>. CA profiles of several cancer  
398 types were retrieved from the TCGA ATAC-seq dataset <sup>28</sup> of 410 primary cancer samples,  
399 representing cancers of 404 unique patient donors and 796 genome-wide profiles in total. We  
400 used 381 CA profiles of the TCGA dataset such that technical and biological replicates of  
401 distinct cancer samples were pooled by per-region averaging CA signal. Prior to this averaging,

402 22 CA profiles for which only one replicate was available were removed, and one CA profile of  
403 a low-grade glioma (LGG) that was an outlier in our initial analyses as also removed. In total,  
404 773 CA profiles were included in the analysis, including 421 cancer profiles, 341 profiles of  
405 normal tissues and cell lines, and 11 profiles of cancer cell lines. Besides these CA profiles, 96  
406 replication timing profiles of 16 cell lines, each with six cell cycle phases, were derived from the  
407 RepliSeq study by Hansen *et al.*<sup>35</sup>. CA and RT profiles were constructed from the BigWig files  
408 of the original studies using mean values of signal intensity per each genomic window. Genomic  
409 coordinates of the GRCh37 reference genome were mapped to the GRCh38 reference genome  
410 using LiftOver. In total, the set of 869 (773 + 96) CA and RT profiles was used.

411 **Integrating regional mutagenesis with CA and RT profiles.** We evaluated chromatin  
412 accessibility, replication timing and mutation burden in non-overlapping genomic regions of one  
413 megabase (Mbp; one million base pairs). We excluded a subset of genomic regions with low  
414 mappability ( $\leq 80\%$  in the UMAP software<sup>53</sup>) as well as sex chromosomes, resulting in 2,465  
415 regions included in the study. For megabase-scale CA and RT profiles, each genomic region was  
416 assigned the mean value of its epigenetic signal. For megabase-scale somatic mutation burden,  
417 each region was assigned the total mutation count separately for the pan-cancer dataset and each  
418 of the 17 cancer types. In two cohorts (chronic lymphocytic leukemia; B-cell non-Hodgkin  
419 lymphoma), we removed two regions encoding immunoglobulin genes (chr2:89Mbps,  
420 chr22:23Mbps) with known high somatic variation in immune cells, as observed in our initial  
421 analyses.

422 **Random forest regression.** Megabase-scale profiles of mutation burden and CA and RT profiles  
423 were analyzed with random forest regression<sup>54</sup> with CA and RT profiles as the predictors (*i.e.*,  
424 features) and mutation burden as the target (*i.e.*, response). Number of trees (1000) and fraction  
425 of predictors at each split (1/3) were used as hyperparameters. Monte-Carlo cross-validation over  
426 1000 data splits considered subsets of genomic regions for model training (80%) and validation  
427 (20%). We used the adjusted  $R^2$  (adj. $R^2$ ) metric to evaluate model performance that measures the  
428 variance explained by the model adjusted for model complexity (*i.e.*, the number of CA and RT  
429 profiles used for predictions).



430 **Comparing CA profiles of primary cancers and normal tissues as predictors of regional**  
431 **mutagenesis.** First, we compared the overall accuracy of predicting megabase-scale mutation  
432 burden using CA profiles of cancers *vs.* normal tissues. Two sets of random forest regression  
433 models were run in a joint Monte-Carlo cross-validation procedure that used all CA profiles of  
434 normal tissues ( $M_n$ ) and cancers ( $M_c$ ) as predictors, respectively. Both models also included the  
435 same set of RT profiles as predictors as reference. At each iteration, models were trained on  
436 matching subsets of genomic regions (80%) and tested on the remaining genomic regions (20%),  
437 and model accuracy ( $\text{adj.R}^2$ ) values as well as the relative change values ( $\Delta\text{adj.R}^2 = \text{adj.R}^2(M_c) -$   
438  $\text{adj.R}^2(M_n)$ ) were derived in the corresponding test sets, allowing us to directly compare the two  
439 models. For each cancer type, median  $\Delta\text{adj.R}^2$  values and 95% confidence intervals were  
440 reported. Empirical P-values were computed as the fraction of cross-validation iterations where  
441 the  $\Delta\text{adj.R}^2$  crossed on the opposite side of zero relative to the median value. We also trained the  
442 models  $M_n$  and  $M_c$  on the full set of genomic regions and compared the accuracy of the two sets  
443 of models. Observed and model-predicted mutation burden values per region were visualized as  
444 scatter plots with local regression (loess) trendlines (span=0.9). Spearman correlation tests were  
445 used to evaluate the associations of model accuracy, WGS cohort size and per-megabase  
446 mutation burden in different cancer types.

447 **Evaluating CA and RT profiles as predictors of regional mutation burden.** We used the  
448 incMSE (increase in model mean-squared-error) metric to evaluate the most important features  
449 (*i.e.*, CA, RT profiles) in random forest models. incMSE measures the relative change in model  
450 prediction accuracy upon permutations of the values of a given feature. We derived incMSE  
451 values of CA and RT profiles for the 17 cancer types for which matching CA and/or RT profiles  
452 were available. Two additional statistical methods were used to evaluate the significance of  
453 incMSE of CA and RT profiles. First, permutation tests were used to detect CA and RT profiles  
454 where incMSE values significantly exceeded those of permuted data. We fitted random forest  
455 regression models for every cancer type 1,000 times using randomly reassigned megabase-scale  
456 mutation burden estimates as null distributions for incMSE values for CA and RT profiles.  
457 Specific profiles were considered statistically significant if their observed incMSE values  
458 exceeded all 1000 incMSE values from permuted datasets (*i.e.*, empirical  $P < 0.001$ ). Second, we  
459 used bootstrapping of random forest regression where the genomic regions with predictor and

460 response values were sampled randomly with replacement. We repeated this resampling process  
461 1000 times and recorded the incMSE values for all CA and RT profiles to evaluate the  
462 confidence intervals of the derived incMSEs.

463 **Feature importance of CA and RT profiles in predictions of regional mutagenesis.** We used  
464 the SHapley Additive exPlanation (SHAP) method <sup>36,55</sup> to interpret the interactions of regional  
465 mutation burden and CA and RT profiles. Here, SHAP scores reflect the importance of each  
466 feature in the random forest model (*i.e.*, CA or RT profile) in predicting a specific observation  
467 (*i.e.*, mutation burden of a certain genomic region), and represent its relative contribution to the  
468 prediction (*i.e.*, effect size) as well as the direction of the prediction (*i.e.*, positive or negative).  
469 SHAP values were computed using models trained all genomic regions and separately for cancer  
470 types, using the python packages shap (0.35.0) <sup>36,55</sup> and scikit-learn (0.23.1) <sup>56</sup> via the R package  
471 reticulate (1.16) <sup>57</sup>.

472 **Associating mutational signatures with CA and RT.** For mutational signature analysis, we  
473 used single base substitution (SBS) annotations of SNVs derived in the PCAWG project <sup>6</sup>. For  
474 each genomic region, we computed the mutational signature burden probabilistically by adding  
475 the SBS-specific probabilities of all individual SNVs in the region, thus accounting for all  
476 signature exposures rather than top-ranking signatures for each SNV. We filtered lower-  
477 frequency SBS signatures in each cancer type (*i.e.*, <20,000 or <5% of all SNVs). To evaluate  
478 CA and RT profiles as predictors of megabase-scale mutational signature burden, we trained  
479 random forest models where a probabilistic SBS profile was used as model response. We  
480 evaluated model performance, selected top features, and computed SHAP scores similarly to  
481 bulk mutation analysis described above. We grouped the mutational signatures based on their  
482 etiology according to the COSMIC database (version 3.2, downloaded in March 2021):  
483 AID/APOBEC, deficient DNA repair, exogenous/carcinogen, unknown/other, SBS5/40 and  
484 SBS1. We compared model accuracy values for predicting regional mutational signature burden  
485 of the six classes of signatures using ANOVA analysis and F-tests. We used the covariate of the  
486 average megabase-scale SBS burden to account for a potential of improved predictions in cancer  
487 types with higher overall mutation burden.

488 **Prioritizing highly-mutated genomic regions exceeding CA and RT predictions.** To study  
489 regional mutation burden unexplained by CA and RT profiles, we prioritized the genomic  
490 regions where the random forest predictions significantly underestimated the observed mutation  
491 burden. Random forest regression was repeated on 100-kbps regions to improve gene-level  
492 interpretation. To score genomic regions, we subtracted the predicted mutation counts from the  
493 observed counts to derive residual values. Residuals were Z-transformed and the resulting one-  
494 tailed *P*-values were adjusted for multiple testing using Benjamini-Hochberg FDR.

495 **Pathway enrichment analysis of regional mutation variation.** To understand the functional  
496 importance of excess mutations unexplained by CA and RT profiles, we performed an integrative  
497 pathway enrichment analysis across the relevant cancer types using the ActivePathways method  
498 <sup>47</sup> (*FDR* < 0.05). Gene sets of biological processes of Gene Ontology and molecular pathways of  
499 Reactome were collected from the GMT files provided in the g:Profiler web server <sup>58</sup>  
500 (downloaded Feb 23<sup>rd</sup>, 2021) and were filtered using default settings of ActivePathways. In each  
501 cancer type, all protein-coding genes were assigned the *P*-values reflecting excess mutation  
502 burden unexplained by CA and RT in respective regions. The data fusion in ActivePathways  
503 prioritized the genes that were frequently mutated in multiple cancer types. Enriched pathways  
504 were visualized as an enrichment map <sup>59</sup> and themes were curated manually. We also visualized  
505 the genomic regions with excess mutations as a scatter plot of residual values and -log<sub>10</sub>-  
506 transformed *FDR* values that were capped at 400, and 10<sup>-50</sup>, respectively. We highlighted known  
507 cancer driver genes of the Cancer Gene Census database <sup>42</sup> (downloaded Mar 26<sup>th</sup> 2021) and  
508 computed their enrichment in the list of pathway-associated genes using a Fisher's exact test.

509 **Code availability.** Source code for this study is available at  
510 [https://github.com/reimandlab/CA2M\\_v2](https://github.com/reimandlab/CA2M_v2).

511 **Acknowledgments.** We thank Christian A. Lee, Kevin Cheng, Phedias Diamandis, and Anne  
512 Martel for constructive comments on this study. This work was supported by the Canadian  
513 Institutes of Health Research (CIHR) Project Grant to J.R., A New Investigator Award of the  
514 Terry Fox Research Institute (TFRI) to J.R., and the Investigator Award to J.R. from the Ontario  
515 Institute for Cancer Research (OICR). Funding to OICR is provided by the Government of  
516 Ontario. The results shown here are in whole or part based upon data generated by the TCGA  
517 Research Network: <https://www.cancer.gov/tcga>. We acknowledge the contributions of the many  
518 clinical networks of ICGC and TCGA who provided samples and data to PCAWG. We thank the  
519 patients and their families for their participation in ICGC and TCGA projects.

520 **Author contributions.** O.O. analyzed the data and prepared the figures. J.R. and O.O.  
521 interpreted the data and wrote the manuscript. J.R. conceived and supervised the project. The  
522 authors reviewed and edited the manuscript and approved the final version.

## 523 References

- 524 1 ICGC-TCGA Pan-Cancer Analysis of Whole Genomes Consortium. Pan-cancer analysis  
525 of whole genomes. *Nature* **578**, 82-93, doi:10.1038/s41586-020-1969-6 (2020).
- 526 2 Gerstung, M. *et al.* The evolutionary history of 2,658 cancers. *Nature* **578**, 122-128,  
527 doi:10.1038/s41586-019-1907-7 (2020).
- 528 3 Martincorena, I. *et al.* Universal Patterns of Selection in Cancer and Somatic Tissues.  
529 *Cell* **171**, 1029-1041 e1021, doi:10.1016/j.cell.2017.09.042 (2017).
- 530 4 Rheinbay, E. *et al.* Analyses of non-coding somatic drivers in 2,693 cancer whole  
531 genomes. *Nature* **578**, 102–111 (2020).
- 532 5 Zhu, H. *et al.* Candidate Cancer Driver Mutations in Distal Regulatory Elements and  
533 Long-Range Chromatin Interaction Networks. *Mol Cell*,  
534 doi:10.1016/j.molcel.2019.12.027 (2020).
- 535 6 Alexandrov, L. B. *et al.* The repertoire of mutational signatures in human cancer. *Nature*  
536 **578**, 94-101, doi:10.1038/s41586-020-1943-3 (2020).
- 537 7 Li, Y. *et al.* Patterns of somatic structural variation in human cancer genomes. *Nature*  
538 **578**, 112-121, doi:10.1038/s41586-019-1913-9 (2020).
- 539 8 Kumar, S. *et al.* Passenger Mutations in More Than 2,500 Cancer Genomes: Overall  
540 Molecular Functional Impact and Consequences. *Cell* **180**, 915-927 e916,  
541 doi:10.1016/j.cell.2020.01.032 (2020).
- 542 9 Martincorena, I. *et al.* Tumor evolution. High burden and pervasive positive selection of  
543 somatic mutations in normal human skin. *Science* **348**, 880-886,  
544 doi:10.1126/science.aaa6806 (2015).
- 545 10 Blokzijl, F. *et al.* Tissue-specific mutation accumulation in human adult stem cells during  
546 life. *Nature* **538**, 260-264, doi:10.1038/nature19768 (2016).
- 547 11 Supek, F. & Lehner, B. Scales and mechanisms of somatic mutation rate variation across  
548 the human genome. *DNA Repair (Amst)*, 102647, doi:10.1016/j.dnarep.2019.102647  
549 (2019).
- 550 12 Gonzalez-Perez, A., Sabarinathan, R. & Lopez-Bigas, N. Local Determinants of the  
551 Mutational Landscape of the Human Genome. *Cell* **177**, 101-114,  
552 doi:10.1016/j.cell.2019.02.051 (2019).
- 553 13 Pich, O. *et al.* The mutational footprints of cancer therapies. *Nature genetics* **51**, 1732-  
554 1740, doi:10.1038/s41588-019-0525-5 (2019).
- 555 14 Katainen, R. *et al.* CTCF/cohesin-binding sites are frequently mutated in cancer. *Nature*  
556 *genetics* **47**, 818-821, doi:10.1038/ng.3335 (2015).
- 557 15 Sabarinathan, R., Mularoni, L., Deu-Pons, J., Gonzalez-Perez, A. & Lopez-Bigas, N.  
558 Nucleotide excision repair is impaired by binding of transcription factors to DNA. *Nature*  
559 **532**, 264-267, doi:10.1038/nature17661 (2016).
- 560 16 Lee, C. A., Abd-Rabbo, D. & Reimand, J. Functional and genetic determinants of  
561 mutation rate variability in regulatory elements of cancer genomes. *Genome Biol* **22**, 133,  
562 doi:10.1186/s13059-021-02318-x (2021).
- 563 17 Lawrence, M. S. *et al.* Mutational heterogeneity in cancer and the search for new cancer-  
564 associated genes. *Nature* **499**, 214-218, doi:10.1038/nature12213 (2013).
- 565 18 Schuster-Bockler, B. & Lehner, B. Chromatin organization is a major influence on  
566 regional mutation rates in human cancer cells. *Nature* **488**, 504-507,  
567 doi:10.1038/nature11273 (2012).

- 568 19 Stamatoyannopoulos, J. A. *et al.* Human mutation rate associated with DNA replication  
569 timing. *Nature genetics* **41**, 393-395, doi:10.1038/ng.363 (2009).
- 570 20 Supek, F. & Lehner, B. Differential DNA mismatch repair underlies mutation rate  
571 variation across the human genome. *Nature* **521**, 81-84, doi:10.1038/nature14173 (2015).
- 572 21 Zheng, C. L. *et al.* Transcription restores DNA repair to heterochromatin, determining  
573 regional mutation rates in cancer genomes. *Cell Rep* **9**, 1228-1234,  
574 doi:10.1016/j.celrep.2014.10.031 (2014).
- 575 22 Woo, Y. H. & Li, W. H. DNA replication timing and selection shape the landscape of  
576 nucleotide variation in cancer genomes. *Nat Commun* **3**, 1004, doi:10.1038/ncomms1982  
577 (2012).
- 578 23 Liu, L., De, S. & Michor, F. DNA replication timing and higher-order nuclear  
579 organization determine single-nucleotide substitution patterns in cancer genomes. *Nat*  
580 *Commun* **4**, 1502, doi:10.1038/ncomms2502 (2013).
- 581 24 Tomkova, M., Tomek, J., Kriaucionis, S. & Schuster-Bockler, B. Mutational signature  
582 distribution varies with DNA replication timing and strand asymmetry. *Genome Biol* **19**,  
583 129, doi:10.1186/s13059-018-1509-y (2018).
- 584 25 Jiao, W. *et al.* A deep learning system accurately classifies primary and metastatic  
585 cancers using passenger mutation patterns. *Nat Commun* **11**, 728, doi:10.1038/s41467-  
586 019-13825-8 (2020).
- 587 26 Polak, P. *et al.* Cell-of-origin chromatin organization shapes the mutational landscape of  
588 cancer. *Nature* **518**, 360-364, doi:10.1038/nature14221 (2015).
- 589 27 Consortium, E. P. *et al.* Expanded encyclopaedias of DNA elements in the human and  
590 mouse genomes. *Nature* **583**, 699-710, doi:10.1038/s41586-020-2493-4 (2020).
- 591 28 Corces, M. R. *et al.* The chromatin accessibility landscape of primary human cancers.  
592 *Science* **362**, doi:10.1126/science.aav1898 (2018).
- 593 29 Fullard, J. F. *et al.* An atlas of chromatin accessibility in the adult human brain. *Genome*  
594 *research* **28**, 1243-1252, doi:10.1101/gr.232488.117 (2018).
- 595 30 Rendeiro, A. F. *et al.* Chromatin mapping and single-cell immune profiling define the  
596 temporal dynamics of ibrutinib response in CLL. *Nat Commun* **11**, 577,  
597 doi:10.1038/s41467-019-14081-6 (2020).
- 598 31 Karabacak Calviello, A., Hirsekorn, A., Wurmus, R., Yusuf, D. & Ohler, U.  
599 Reproducible inference of transcription factor footprints in ATAC-seq and DNase-seq  
600 datasets using protocol-specific bias modeling. *Genome Biol* **20**, 42, doi:10.1186/s13059-  
601 019-1654-y (2019).
- 602 32 Scharer, C. D. *et al.* Genome-wide CIITA-binding profile identifies sequence preferences  
603 that dictate function versus recruitment. *Nucleic Acids Res* **43**, 3128-3142,  
604 doi:10.1093/nar/gkv182 (2015).
- 605 33 Fontanals-Cirera, B. *et al.* Harnessing BET Inhibitor Sensitivity Reveals AMIGO2 as a  
606 Melanoma Survival Gene. *Mol Cell* **68**, 731-744 e739, doi:10.1016/j.molcel.2017.11.004  
607 (2017).
- 608 34 Pomerantz, M. M. *et al.* Prostate cancer reactivates developmental epigenomic programs  
609 during metastatic progression. *Nature genetics* **52**, 790-799, doi:10.1038/s41588-020-  
610 0664-8 (2020).
- 611 35 Hansen, R. S. *et al.* Sequencing newly replicated DNA reveals widespread plasticity in  
612 human replication timing. *Proc Natl Acad Sci U S A* **107**, 139-144,  
613 doi:10.1073/pnas.0912402107 (2010).

- 614 36 Lundberg, S. M. *et al.* From Local Explanations to Global Understanding with  
615 Explainable AI for Trees. *Nat Mach Intell* **2**, 56-67, doi:10.1038/s42256-019-0138-9  
616 (2020).
- 617 37 Odegard, V. H. & Schatz, D. G. Targeting of somatic hypermutation. *Nat Rev Immunol* **6**,  
618 573-583, doi:10.1038/nri1896 (2006).
- 619 38 Alexandrov, L. B. *et al.* Clock-like mutational processes in human somatic cells. *Nature*  
620 *genetics* **47**, 1402-1407, doi:10.1038/ng.3441 (2015).
- 621 39 Abascal, F. *et al.* Somatic mutation landscapes at single-molecule resolution. *Nature*,  
622 doi:10.1038/s41586-021-03477-4 (2021).
- 623 40 Wang, Q. *et al.* Epigenetic targeting of activation-induced cytidine deaminase. *Proc Natl*  
624 *Acad Sci U S A* **111**, 18667-18672, doi:10.1073/pnas.1420575111 (2014).
- 625 41 Supek, F. & Lehner, B. Clustered Mutation Signatures Reveal that Error-Prone DNA  
626 Repair Targets Mutations to Active Genes. *Cell* **170**, 534-547 e523,  
627 doi:10.1016/j.cell.2017.07.003 (2017).
- 628 42 Futreal, P. A. *et al.* A census of human cancer genes. *Nat Rev Cancer* **4**, 177-183,  
629 doi:10.1038/nrc1299 (2004).
- 630 43 Nik-Zainal, S. *et al.* Landscape of somatic mutations in 560 breast cancer whole-genome  
631 sequences. *Nature* **534**, 47-54, doi:10.1038/nature17676 (2016).
- 632 44 Iida, S. *et al.* Deregulation of MUM1/IRF4 by chromosomal translocation in multiple  
633 myeloma. *Nature genetics* **17**, 226-230, doi:10.1038/ng1097-226 (1997).
- 634 45 Reyna, M. A. *et al.* Pathway and network analysis of more than 2,500 whole cancer  
635 genomes. *Nature Communications* **11**, 729 (2020).
- 636 46 Hnisz, D. *et al.* Super-enhancers in the control of cell identity and disease. *Cell* **155**, 934-  
637 947, doi:10.1016/j.cell.2013.09.053 (2013).
- 638 47 Paczkowska, M. *et al.* Integrative pathway enrichment analysis of multivariate omics  
639 data. *Nature Communications* **11**, 735 (2020).
- 640 48 Klein, K. N. *et al.* Replication timing maintains the global epigenetic state in human  
641 cells. *Science* **372**, 371-378, doi:10.1126/science.aba5545 (2021).
- 642 49 Kucab, J. E. *et al.* A Compendium of Mutational Signatures of Environmental Agents.  
643 *Cell* **177**, 821-836 e816, doi:10.1016/j.cell.2019.03.001 (2019).
- 644 50 Imielinski, M., Guo, G. & Meyerson, M. Insertions and Deletions Target Lineage-  
645 Defining Genes in Human Cancers. *Cell* **168**, 460-472 e414,  
646 doi:10.1016/j.cell.2016.12.025 (2017).
- 647 51 Dentre, S. C. *et al.* Characterizing genetic intra-tumor heterogeneity across 2,658 human  
648 cancer genomes. *Cell*, doi:10.1016/j.cell.2021.03.009 (2021).
- 649 52 Lawrence, M., Gentleman, R. & Carey, V. rtracklayer: an R package for interfacing with  
650 genome browsers. *Bioinformatics* **25**, 1841-1842, doi:10.1093/bioinformatics/btp328  
651 (2009).
- 652 53 Karimzadeh, M., Ernst, C., Kundaje, A. & Hoffman, M. M. Umap and Bismap:  
653 quantifying genome and methylome mappability. *Nucleic Acids Res* **46**, e120,  
654 doi:10.1093/nar/gky677 (2018).
- 655 54 Ho, T. K. Random decision forests. *IEEE Proceedings of 3rd international conference on*  
656 *document analysis and recognition* **1**, 278-282, doi:doi:10.1109/ICDAR.1995.598994  
657 (1995).
- 658 55 Lundberg, S. M. & Lee, S. A Unified Approach to Interpreting Model Predictions.  
659 *Advances in Neural Information Processing Systems (NIPS)* **30** (2017).

- 660 56 Pedregosa, F. *et al.* Scikit-learn: Machine Learning in Python. *Journal of Machine*  
661 *Learning Research* **12**, 2825-2830 (2011).
- 662 57 Ushey, K., Allaire, J. J. & Tang, Y. Reticulate R Package. *GitHub*  
663 <https://rstudio.github.io/reticulate/> doi:<https://rstudio.github.io/reticulate/> (2021).
- 664 58 Reimand, J., Kull, M., Peterson, H., Hansen, J. & Vilo, J. g:Profiler--a web-based toolset  
665 for functional profiling of gene lists from large-scale experiments. *Nucleic acids research*  
666 **35**, W193-200, doi:10.1093/nar/gkm226 (2007).
- 667 59 Reimand, J. *et al.* Pathway enrichment analysis and visualization of omics data using  
668 g:Profiler, GSEA, Cytoscape and EnrichmentMap. *Nat Protoc* **14**, 482-517,  
669 doi:10.1038/s41596-018-0103-9 (2019).
- 670
